# Supplementary material for: Urinary EGF and MCP-1 and risk of CKD after cardiac surgery
Source: PubMed Central journal article supplement (PMC8262289; doi:10.1172/jci.insight.147464), 2021-06-08
Supplement: jciinsight-6-147464-s254.pdf [file jciinsight-6-147464-s254.pdf]

# SUPPLEMENTARY MATERIAL

## Urinary EGF and MCP-1 and risk of CKD after cardiac surgery

Steven Menez, MD, MHS<sup>\*1</sup>; Wenjun Ju, PhD<sup>\*2</sup>; Rajasree Menon, PhD<sup>2</sup>; Dennis G. Moledina, MBBS, PhD<sup>3,4</sup>; Heather Thiessen-Philbrook, MMath<sup>1</sup>; Eric McArthur, MSc<sup>5</sup>; Yaqi Jia, MPH<sup>1</sup>; Wassim Obeid, PhD<sup>1</sup>; Sherry G. Mansour, DO, MS<sup>3,4</sup>; Jay L. Koyner, MD<sup>6</sup>; Michael G. Shlipak, MD, MPH<sup>7</sup>; Steven G. Coca, DO, MS<sup>8</sup>; Amit X. Garg, MD, PhD<sup>5,9,10</sup>; Andrew S. Bomback, MD<sup>11</sup>; John A. Kellum, MD<sup>12</sup>; Matthias Kretzler, MD<sup>2</sup>; Chirag R. Parikh, MD, PhD<sup>1</sup> for the TRIBE-AKI Consortium and the Kidney Precision Medicine Project

1. Division of Nephrology, Department of Medicine, Johns Hopkins University School of Medicine, Baltimore, Maryland
2. Division of Nephrology, Department of Medicine, Department of Computational Medicine and Bioinformatics, University of Michigan, Ann Arbor, Michigan
3. Section of Nephrology, Department of Internal Medicine, Yale University School of Medicine, New Haven, Connecticut
4. Clinical and Translational Research Accelerator, Department of Internal Medicine, Yale University School of Medicine, New Haven, Connecticut
5. ICES, Ontario, Canada
6. Section of Nephrology, University of Chicago, Chicago, Illinois
7. Kidney Health Research Collaborative and Division of General Internal Medicine, San Francisco Veterans Affairs Medical Center, University of California San Francisco, San Francisco, California
8. Division of Nephrology, Department of Medicine, Icahn School of Medicine at Mount Sinai, New York, New York
9. Division of Nephrology, Department of Medicine, Schulich School of Medicine and Dentistry, Western University, London, Ontario, Canada
10. Department of Epidemiology and Biostatistics, Schulich School of Medicine and Dentistry, Western University, London, Ontario, Canada
11. Division of Nephrology, Department of Medicine, Columbia University Vagelos College of Physicians and Surgeons, New York, NY
12. The Center for Critical Care Nephrology, Department of Critical Care Medicine, University of Pittsburgh, Pittsburgh, PA, USA

| <b>Supplemental Table 1. Baseline characteristics by post-operative urine MCP-1 tertiles</b> |                      |                                |                                |                                   |
|----------------------------------------------------------------------------------------------|----------------------|--------------------------------|--------------------------------|-----------------------------------|
| <b>Variable<br/>(level, pg/ml)</b>                                                           | <b>All (N = 865)</b> | <b>Tertile 1<br/>(4.7-143)</b> | <b>Tertile 2<br/>(144-345)</b> | <b>Tertile 3<br/>(346-11,683)</b> |
| Age at the time of surgery                                                                   | 71.8 ± 9.0           | 71.5 ± 9.7                     | 71.8 ± 8.2                     | 72.1 ± 9.1                        |
| White race                                                                                   | 837 (96.8)           | 280 (94.6)                     | 293 (98.0)                     | 264 (97.8)                        |
| Male sex                                                                                     | 615 (71.1)           | 194 (65.5)                     | 221 (73.9)                     | 200 (74.1)                        |
| Diabetes                                                                                     | 344 (39.8)           | 112 (37.8)                     | 142 (47.5)                     | 90 (33.3)                         |
| Hypertension                                                                                 | 678 (78.4)           | 228 (77.0)                     | 229 (76.6)                     | 221 (81.9)                        |
| LVEF <35%                                                                                    | 67 (7.7)             | 18 (6.1)                       | 18 (6.0)                       | 31 (11.5)                         |
| Previous myocardial infarction                                                               | 216 (25.0)           | 55 (18.6)                      | 94 (31.4)                      | 67 (24.8)                         |
| Congestive heart failure                                                                     | 109 (12.6)           | 34 (11.5)                      | 31 (10.4)                      | 44 (16.3)                         |
| Mean pre-operative eGFR,<br>mL/min/1.73m <sup>2</sup>                                        | 69.5 ± 18.1          | 71.3 ± 16.6                    | 69.7 ± 18.3                    | 67.4 ± 19.3                       |
| CKD stage 3 or greater                                                                       | 263 (30.4)           | 81 (27.3%)                     | 92 (30.8)                      | 90 (33.3)                         |
| Mean pre-operative urine<br>albumin/Cr ratio, mg/g                                           | 64.0 ± 187.2         | 43.5 ± 105.1                   | 80.6 ± 249.7                   | 67.9 ± 174.8                      |
| Perfusion time                                                                               | 108.1 ± 55.1         | 97.1 ± 41.9                    | 99.6 ± 49.4                    | 130.3 ± 67.0                      |
| Cross-clamp time                                                                             | 75.4 ± 42.5          | 70.2 ± 34.5                    | 68.3 ± 39.6                    | 89.5 ± 50.1                       |
| Surgery type                                                                                 |                      |                                |                                |                                   |
| - CABG and valve                                                                             | 189 (21.8)           | 56 (18.9)                      | 53 (17.7)                      | 80 (29.6)                         |
| - Other                                                                                      | 9 (1.0)              | 2 (0.7)                        | 2 (0.7)                        | 5 (1.9)                           |
| - CABG only                                                                                  | 432 (49.9)           | 153 (51.7)                     | 175 (58.5)                     | 104 (38.5)                        |
| - Valve only                                                                                 | 235 (27.2)           | 85 (28.7)                      | 69 (23.1)                      | 81 (30.0)                         |
| Elective surgery                                                                             | 785 (90.8)           | 276 (93.2)                     | 268 (89.6)                     | 241 (89.3)                        |

Data are presented as mean ± SD and frequency (%) for continuous and categorical variables, respectively

CABG = coronary artery bypass graft; CKD = chronic kidney disease; Cr = creatinine; eGFR = estimated glomerular filtration rate; LVEF = left ventricular ejection fraction; MCP-1 = major chemoattractant protein 1.

The number of patients per tertile: T1 n=296, T2 n=299, T3 n=270

| <b>Supplemental Table 2. CKD incidence or progression event rate</b> |            |                                           |
|----------------------------------------------------------------------|------------|-------------------------------------------|
| <b>Event</b>                                                         | <b>n/N</b> | <b>Event Rate (per 1000 person-years)</b> |
| Composite CKD outcome overall                                        | 266/865    | 55.4 (49.2-62.5)                          |
| - <i>CKD incidence</i>                                               | 212/602    | 64.7 (56.6-74.1)                          |
| - <i>CKD progression</i>                                             | 54/263     | 35.4 (27.1-46.3)                          |
| Composite CKD outcome in those with AKI                              | 105/271    | 73.9 (61.0-89.4)                          |
| Composite CKD outcome in those without AKI                           | 161/594    | 47.7 (40.8-55.6)                          |

AKI = acute kidney injury; CKD = chronic kidney disease.

**Supplemental Table 3. Association of post-operative urine biomarker tertiles with risk of composite CKD outcome**

| <b>Biomarker</b>                 | <b>Tertile</b>          | <b>Adjusted HR for Urine Creatinine (95% CI)</b> | <b>Fully Adjusted* HR (95% CI)</b> |
|----------------------------------|-------------------------|--------------------------------------------------|------------------------------------|
| Urine EGF (pg/mL) <sup>‡</sup>   | Tertile 1 (83.5-417.8)  | 1.00 (referent)                                  | 1.00 (referent)                    |
|                                  | Tertile 2 (420.5-1031)  | 0.84 (0.62-1.16)                                 | 0.91 (0.66-1.25)                   |
|                                  | Tertile 3 (1033-19242)  | 0.59 (0.39-0.91) <sup>†</sup>                    | 0.68 (0.43-1.07)                   |
| Urine MCP-1 (pg/mL) <sup>‡</sup> | Tertile 1 (4.7-143)     | 1.00 (referent)                                  | 1.00 (referent)                    |
|                                  | Tertile 2 (144-345)     | 1.59 (1.15-1.22) <sup>†</sup>                    | 1.46 (1.03-2.07) <sup>†</sup>      |
|                                  | Tertile 3 (346-11683)   | 1.68 (1.18-2.38) <sup>†</sup>                    | 1.48 (0.99-2.22)                   |
| Urine EGF/MCP-1 <sup>‡</sup>     | Tertile 1 (0.01-1.77)   | 1.00 (referent)                                  | 1.00 (referent)                    |
|                                  | Tertile 2 (1.78-5.42)   | 0.96 (0.72-1.26)                                 | 0.95 (0.70-1.29)                   |
|                                  | Tertile 3 (5.44-108.73) | 0.48 (0.34-0.67) <sup>†</sup>                    | 0.50 (0.33-0.74) <sup>†</sup>      |

\*Adjusted for age, sex, race, elective surgery, type of surgery, pre-operative eGFR, diabetes, hypertension, congestive heart failure, myocardial infarction, post-operative albuminuria, post-operative urine creatinine, AKI stage, cardiopulmonary bypass time, and study site

†:  $P < 0.05$

‡: Log<sub>2</sub>-transformed

| <b>Supplemental Table 4. Risk of composite CKD outcome by pre-operative urine biomarker level</b> |                                    |
|---------------------------------------------------------------------------------------------------|------------------------------------|
| <b>Biomarker</b>                                                                                  | <b>Fully Adjusted* HR (95% CI)</b> |
| Urine EGF (pg/mL)‡                                                                                | 0.99 (0.85-1.15)                   |
| Urine MCP-1 (pg/mL)‡                                                                              | 1.23 (1.10-1.38)†                  |
| Urine EGF/MCP-1‡                                                                                  | 0.79 (0.71-0.89)†                  |

\*Adjusted for age, sex, race, elective surgery, type of surgery, pre-operative eGFR, diabetes, hypertension, congestive heart failure, myocardial infarction, pre-operative urinary albumin, pre-operative urinary creatinine, and study site

†:  $P < 0.05$

‡: Log<sub>2</sub>-transformed

| <b>Supplemental Table 5. Risk of CKD incidence or progression by post-operative urine biomarker level, adjusted for pre-operative level</b> |                                    |
|---------------------------------------------------------------------------------------------------------------------------------------------|------------------------------------|
| <b>Biomarker</b>                                                                                                                            | <b>Fully Adjusted* HR (95% CI)</b> |
| Urine EGF (pg/mL)‡                                                                                                                          | 0.84 (0.73-0.96)†                  |
| Urine MCP-1 (pg/mL)‡                                                                                                                        | 1.08 (0.98-1.19)                   |
| Urine EGF/MCP-1‡                                                                                                                            | 0.91 (0.83-0.99)†                  |

\* Adjusted for age, sex, race, elective surgery, type of surgery, pre-operative eGFR, diabetes, hypertension, congestive heart failure, myocardial infarction, post-operative albuminuria, post-operative urine creatinine, AKI stage, cardiopulmonary bypass time, and study site, and pre-operative biomarker level

†:  $P < 0.05$

‡: Log<sub>2</sub>-transformed

| <b>Supplemental Table 6. Basic clinical data of AKI patients included in the ScRNAseq analysis. Data derived from open access at KPMP.org</b> |            |                    |                           |                    |                                      |                 |                     |
|-----------------------------------------------------------------------------------------------------------------------------------------------|------------|--------------------|---------------------------|--------------------|--------------------------------------|-----------------|---------------------|
| <b>Tissue Type</b>                                                                                                                            | <b>Sex</b> | <b>Age (Years)</b> | <b>Race</b>               | <b>KDIGO Stage</b> | <b>Baseline eGFR (ml/min/1.73m2)</b> | <b>Diabetes</b> | <b>Hypertension</b> |
| AKI                                                                                                                                           | Male       | 30-39              | Black or African-American | Stage 2            | 90-99                                | Yes             | Yes                 |
| AKI                                                                                                                                           | Female     | 70-79              | Black or African-American | Stage 2            | 70-79                                | Yes             | Yes                 |
| AKI                                                                                                                                           | Female     | 30-39              | White                     | Stage 3            | 110-119                              | No              | No                  |
| AKI                                                                                                                                           | Male       | 40-49              | Black or African-American | Stage 3            | 70-79                                | Yes             | Yes                 |
| AKI                                                                                                                                           | Male       | 50-59              | Black or African-American | Stage 3            | 100-109                              | No              | No                  |
| AKI                                                                                                                                           | Male       | 30-39              | Don't Know                | Stage 2            | 120-129                              | No              | No                  |
| AKI                                                                                                                                           | Male       | 60-69              | White                     | Stage 2            | 60-69                                | Yes             | No                  |
| AKI                                                                                                                                           | Male       | 70-79              | White                     | Stage 3            | 70-79                                | Don't Know      | No                  |
| AKI                                                                                                                                           | Male       | 60-69              | White                     | Stage 3            | 80-89                                | Yes             | Yes                 |
| AKI                                                                                                                                           | Male       | 60-69              | White                     | Stage 3            | 70-79                                | No              | Yes                 |
| AKI                                                                                                                                           | Male       | 20-29              | White                     | Stage 3            | 70-79                                | No              | No                  |
| AKI                                                                                                                                           | Female     | 60-69              | White                     | Stage 3            | 50-59                                | Yes             | No                  |
| AKI                                                                                                                                           | Female     | 50-59              | White                     | Stage 1            | 70-79                                | No              | No                  |
| AKI                                                                                                                                           | Male       | 20-29              | Black or African-American | Stage 2            | 70-79                                | No              | No                  |

**Supplemental Table 7. Top 20 canonical pathways (by P value enrichment) enriched in EGF co-regulated transcripts in DCT cells of patients with AKI. Pathways are only included when more than 3 molecules in the particular pathway are present in the signature. \* denotes pathways that are also significantly enriched in the same analysis in TAL cells**

| <b>Ingenuity Canonical Pathways</b>             | <b>Molecules</b>                                               | <b>P value</b> | <b>Z-score</b> |
|-------------------------------------------------|----------------------------------------------------------------|----------------|----------------|
| Oxidative Phosphorylation*                      | MT-CO3,MT-ND1,MT-ND3,NDUFA13,NDUFA3,NDUFA7,NDUFB1              | <0.001         | -2.65          |
| Mitochondrial Dysfunction*                      | BACE2,MT-CO3,MT-ND1,MT-ND3,NDUFA13,NDUFA3,NDUFA7,NDUFB1        | <0.001         |                |
| ErbB Signaling                                  | EGF,ERBB2,ERBB4,MAP2K6,PAK4,PIK3C2G                            | <0.001         | -2.24          |
| TR/RXR Activation*                              | ACACA,DIO2,NCOA4,PIK3C2G,THRA                                  | 0.001          |                |
| Sirtuin Signaling Pathway*                      | BCL2L11,GOT2,MT-ND1,MT-ND3,NDUFA13,NDUFA3,NDUFA7,NDUFB1,SCNN1A | 0.002          | 2.83           |
| PPAR $\alpha$ /RXR $\alpha$ Activation*         | ADIPOR1,GOT2,INSR,LPL,MAP2K6,PLCL1,STAT5B                      | 0.002          | -0.82          |
| Telomerase Signaling                            | EGF,PIK3C2G,PPM1L,TERF2IP,TPP1                                 | 0.004          |                |
| Integrin Signaling                              | BCAR3,CAPN10,PAK4,PFN2,PIK3C2G,RHOQ,TSPAN7                     | 0.004          | -2.45          |
| IL-15 Production                                | DSTYK,ERBB2,ERBB4,INSR,MAP2K6                                  | 0.006          | -2.24          |
| Insulin Secretion Signaling Pathway             | GCGR,INSR,PIK3C2G,PLCL1,SCNN1A,STAT5B,VAMP2                    | 0.009          | -2.65          |
| Semaphorin Neuronal Repulsive Signaling Pathway | ERBB2,MAP2K6,PAK4,PIK3C2G,SEMA6D                               | 0.011          | -0.45          |
| Insulin Receptor Signaling                      | INSR,PIK3C2G,RHOQ,SCNN1A,VAMP2                                 | 0.011          | -2.24          |
| Senescence Pathway                              | CAPN10,MAP2K6,NF1,PHF1,PIK3C2G,PPM1L,RBL2                      | 0.016          | -1.13          |
| FAK Signaling*                                  | CAPN10,EGF,PAK4,PIK3C2G                                        | 0.017          |                |
| Neuregulin Signaling                            | EGF,ERBB2,ERBB4,STAT5B                                         | 0.018          | -2.00          |
| Sperm Motility                                  | DSTYK,ERBB2,ERBB4,INSR,MAP2K6,PLCL1                            | 0.020          |                |
| Pancreatic Adenocarcinoma Signaling             | EGF,ERBB2,PIK3C2G,VEGFA                                        | 0.020          | -2.00          |
| Glioblastoma Multiforme Signaling               | EGF,NF1,PIK3C2G,PLCL1,RHOQ                                     | 0.021          | -2.00          |
| Actin Cytoskeleton Signaling*                   | CYFIP2,EGF,KNG1,PAK4,PFN2,PIK3C2G                              | 0.022          |                |
| LXR/RXR Activation                              | ACACA,HADH,KNG1,LPL                                            | 0.028          |                |
| Growth Hormone Signaling                        | IGFBP3,PIK3C2G,STAT5B                                          | 0.030          |                |
| Xenobiotic Metabolism CAR Signaling Pathway     | ALDH5A1,ALDH6A1,HS6ST2,MAP2K6,PPM1L                            | 0.035          | -1.34          |
| ILK Signaling                                   | MAP2K6,PIK3C2G,PPM1L,RHOQ,VEGFA                                | 0.035          | -1.34          |
| STAT3 Pathway                                   | EGF,INSR,NDUFA13,VEGFA                                         | 0.040          | -1.00          |
| Axonal Guidance Signaling                       | EGF,ERBB2,NTN4,PAK4,PFN2,PIK3C2G,PLCL1,SEMA6D,VEGFA            | 0.047          |                |



| <b>Supplemental Table 8. Top 20 canonical pathways (by <i>P</i> value enrichment) enriched in <i>CCL2</i> co-regulated transcripts in ATL cells of patients with AKI. Pathways are only included when more than 3 molecules in the particular pathway are present in the signature. * denotes pathways that are also significantly enriched in the same analysis in TAL cells</b> |                                                                                                                                                                                                                                                                                                                                                                                                                        |                |                |
|-----------------------------------------------------------------------------------------------------------------------------------------------------------------------------------------------------------------------------------------------------------------------------------------------------------------------------------------------------------------------------------|------------------------------------------------------------------------------------------------------------------------------------------------------------------------------------------------------------------------------------------------------------------------------------------------------------------------------------------------------------------------------------------------------------------------|----------------|----------------|
| <b>Ingenuity Canonical Pathways</b>                                                                                                                                                                                                                                                                                                                                               | <b>Molecules</b>                                                                                                                                                                                                                                                                                                                                                                                                       | <b>P value</b> | <b>Z-score</b> |
| Hepatic Fibrosis Signaling Pathway                                                                                                                                                                                                                                                                                                                                                | ATF4,CALM1 (includes others),CCL2,CCN2,CD40,CEBPB,CXCL8,EDN1,FGFR1,GNAI3,HIF1A,ICAM1,IKBKB,ITGA3,ITGAV,ITGB1,ITGB3,MYC,MYL12A,MYL12B,MYL6,MYL9,MYLK,NFKB2,NFKBIA,PDGFB,PRKCA,PRKCI,RAC1,RAP1B,RASD1,RHOB,RHOC,RHOG,RND3,RRAS2,SOD2,SPP1,STAT3,TGFB1                                                                                                                                                                    | 3.4E-09        | 5.284          |
| EIF2 Signaling*                                                                                                                                                                                                                                                                                                                                                                   | ACTB,ATF4,ATF5,EIF1,EIF2S2,EIF3A,EIF3G,EIF3J,EIF3M,EIF4A1,EIF4G1,EIF4G2,FAU,MYC,PABPC1,PPP1CA,PPP1CB,RAP1B,RASD1,RPL11,RPL12,RPL14,RPL18A,RPL19,RPL22,RPL22L1,RPL23,RPL24,RPL26,RPL27,RPL28,RPL29,RPL31,RPL32,RPL34,RPL35,RPL35A,RPL36,RPL36AL,RPL37,RPL38,RPL39,RPL41,RPL7,RPL7A,RPL8,RPLP0,RPLP1,RPLP2,RPS12,RPS13,RPS15,RPS15A,RPS16,RPS17,RPS18,RPS19,RPS21,RPS23,RPS24,RPS25,RPS26,RPS27A,RPS27L,RPS28,RPS7,RRAS2 | 1.3E-41        | 5.096          |
| Integrin Signaling*                                                                                                                                                                                                                                                                                                                                                               | ACTB,ACTG1,ACTN1,ACTN4,ACTR3,ARF3,ARF4,ARF5,ARPC1B,ARPC2,ARPC3,ARPC4,ARPC5,ARPC5L,BCAR1,CAPNS1,CAV1,ILK,ITGA3,ITGAV,ITGB1,ITGB3,ITGB6,MYL12A,MYL12B,MYL9,MYLK,NEDD9,PDGFB,PFN1,PPP1CB,RAC1,RAP1B,RASD1,RHOB,RHOC,RHOG,RND3,RRAS2,VCL,ZYX                                                                                                                                                                               | 4.0E-18        | 5.096          |
| Actin Cytoskeleton Signaling*                                                                                                                                                                                                                                                                                                                                                     | ACTB,ACTG1,ACTN1,ACTN4,ACTR3,ARPC1B,ARPC2,ARPC3,ARPC4,ARPC5,ARPC5L,BCAR1,BRK1,CFL1,DIAPH1,DIAPH3,FLNA,ITGA3,ITGAV,ITGB1,ITGB3,MSN,MYH9,MYL12A,MYL12B,MYL6,MYL9,MYLK,PDGFB,PFN1,PPP1CB,RAC1,RAP1B,RASD1,RRAS2,SLC9A1,TMSB10/TMSB4X,TRIO,VCL                                                                                                                                                                             | 1.6E-15        | 5.048          |
| Signaling by Rho Family GTPases*                                                                                                                                                                                                                                                                                                                                                  | ACTB,ACTG1,ACTR3,ARPC1B,ARPC2,ARPC3,ARPC4,ARPC5,ARPC5L,CDC42EP1,CFL1,DIAPH3,GNAI3,GNB2,ITGA3,ITGAV,ITGB1,ITGB3,MSN,MYL12A,MYL12B,MYL6,MYL9,MYLK,NFKB2,PARD3,PRKCI,RAC1,RHOB,RHOC,RHOG,RND3,SLC9A1,STMN1,VIM                                                                                                                                                                                                            | 2.5E-11        | 4.536          |
| Ephrin Receptor Signaling*                                                                                                                                                                                                                                                                                                                                                        | ACTR3,ARPC1B,ARPC2,ARPC3,ARPC4,ARPC5,ARPC5L,ATF4,BCAR1,CFL1,EFNA1,EFNB2,EPHA2,EPHB2,GNAI3,GNB2,ITGA3,ITGAV,ITGB1,ITGB3,PDGFB,PTPN11,RAC1,RAP1B,RASD1,RGS3,RRAS2,SDCBP,STAT3                                                                                                                                                                                                                                            | 1.1E-10        | 4.146          |
| ILK Signaling*                                                                                                                                                                                                                                                                                                                                                                    | ACTB,ACTG1,ACTN1,ACTN4,ATF4,CFL1,FLNA,HIF1A,ILK,IRS1,ITGB1,ITGB3,ITGB6,KRT18,MYC,MYH9,MYL6,MYL9,NFKB2,PPP1R14B,PPP2R5A,RAC1,RHOB,RHOC,RHOG,RND3,TMSB10/TMSB4X,VCL,VIM                                                                                                                                                                                                                                                  | 1.3E-10        | 4.041          |
| Actin Nucleation by ARP-WASP Complex*                                                                                                                                                                                                                                                                                                                                             | ACTR3,ARPC1B,ARPC2,ARPC3,ARPC4,ARPC5,ARPC5L,ITGA3,ITGAV,ITGB1,ITGB3,RAC1,RAP1B,RASD1,RHOB,RHOC,RHOG,RND3,RRAS2                                                                                                                                                                                                                                                                                                         | 1.1E-10        | 4              |

|                                              |                                                                                                                                                                                                                                                               |         |        |
|----------------------------------------------|---------------------------------------------------------------------------------------------------------------------------------------------------------------------------------------------------------------------------------------------------------------|---------|--------|
| Rac Signaling*                               | ACTR3,ARPC1B,ARPC2,ARPC3,ARPC4,ARPC5,ARPC5L,BRK1,CD44,CFL1,ITGA3,ITGAV,ITGB1,ITGB3,NFKB2,PARD3,PRKCI,RAC1,RAP1B,RASD1,RRAS2                                                                                                                                   | 4.4E-09 | 4      |
| Regulation of Actin-based Motility by Rho*   | ACTB,ACTR3,ARPC1B,ARPC2,ARPC3,ARPC4,ARPC5,ARPC5L,CFL1,ITGA3,ITGAV,ITGB1,ITGB3,MYL12A,MYL12B,MYL6,MYL9,MYLK,PFN1,PPP1CB,RAC1,RHOB,RHOC,RHOG,RND3                                                                                                               | 5.0E-14 | 3.838  |
| mTOR Signaling*                              | EIF3A,EIF3G,EIF3J,EIF3M,EIF4A1,EIF4B,EIF4EBP1,EIF4G1,EIF4G2,FAU,FKBP1A,HIF1A,IRS1,PPP2R5A,PRKCA,PRKCI,RAC1,RAP1B,RASD1,RHEB,RHOB,RHOC,RHOG,RND3,RPS12,RPS13,RPS15,RPS15A,RPS16,RPS17,RPS18,RPS19,RPS21,RPS23,RPS24,RPS25,RPS26,RPS27A,RPS27L,RPS28,RPS7,RRAS2 | 4.0E-19 | 3.5    |
| RhoA Signaling*                              | ACTB,ACTG1,ACTR3,ARPC1B,ARPC2,ARPC3,ARPC4,ARPC5,ARPC5L,CDC42EP1,CFL1,MSN,MYL12A,MYL12B,MYL6,MYL9,MYLK,PFN1,PPP1CB,RHPN2,RND3                                                                                                                                  | 5.9E-09 | 3.273  |
| Remodeling of Epithelial Adherens Junctions* | ACTB,ACTG1,ACTN1,ACTN4,ACTR3,ARPC1B,ARPC2,ARPC3,ARPC4,ARPC5,ARPC5L,HGS,NME1,TUBA1A,TUBB,VCL,ZYX                                                                                                                                                               | 3.6E-10 | 2.828  |
| ERK/MAPK Signaling*                          | ATF4,BCAR1,DUSP1,EIF4EBP1,ELF3,ETS1,H3-3A/H3-3B,HSPB1,ITGA3,ITGAV,ITGB1,ITGB3,MYC,PPP1CA,PPP1CB,PPP1R14B,PPP2R5A,PRKCA,PRKCI,RAC1,RAP1B,RASD1,RRAS2,STAT1,STAT3,YWHAB,YWHAG,YWHAZ                                                                             | 2.5E-09 | 2.132  |
| Regulation of eIF4 and p70S6K Signaling*     | EIF1,EIF2S2,EIF3A,EIF3G,EIF3J,EIF3M,EIF4A1,EIF4EBP1,EIF4G1,EIF4G2,FAU,IRS1,ITGA3,ITGAV,ITGB1,ITGB3,PABPC1,PPP2R5A,RAP1B,RASD1,RPS12,RPS13,RPS15,RPS15A,RPS16,RPS17,RPS18,RPS19,RPS21,RPS23,RPS24,RPS25,RPS26,RPS27A,RPS27L,RPS28,RPS7,RRAS2                   | 1.3E-19 | 1.633  |
| Sirtuin Signaling Pathway*                   | ACLY,APEX1,BAX,CXCL8,EPAS1,GABARAP,GLS,H3-3A/H3-3B,HIF1A,MAP1LC3B,MYC,NAMPT,NDUFA2,NDUFA6,NDUFB3,NDUFB4,NDUFB6,NDUFS5,NDUFS6,NDUFS7,NDUFS8,NFKB2,PARP1,PGK1,POLR1D,POLR2F,SLC25A5,SLC2A1,SMARCA5,SOD2,STAT3,TIMM10,TIMM13,TIMM17A,TIMM8B,TUBA1A,VDAC1         | 1.0E-10 | -1.4   |
| Coronavirus Pathogenesis Pathway*            | ATF4,BAX,CCL2,CXCL8,EEF1A1,FAU,IKBKB,KPNB1,NFKB2,NFKBIA,NPM1,PA2G4,RPS12,RPS13,RPS15,RPS15A,RPS16,RPS17,RPS18,RPS19,RPS21,RPS23,RPS24,RPS25,RPS26,RPS27A,RPS27L,RPS28,RPS7,STAT1,STAT3,TGFB1                                                                  | 1.0E-15 | -3.053 |
| RhoGDI Signaling*                            | ACTB,ACTG1,ACTR3,ARPC1B,ARPC2,ARPC3,ARPC4,ARPC5,ARPC5L,CD44,CFL1,GNAI3,GNB2,ITGA3,ITGAV,ITGB1,ITGB3,MSN,MYL12A,MYL12B,MYL6,MYL9,PRKCA,RAC1,RHOB,RHOC,RHOG,RND3                                                                                                | 5.4E-10 | -4.491 |
| Epithelial Adherens Junction Signaling*      | ACTB,ACTG1,ACTN1,ACTN4,ACTR3,ARPC1B,ARPC2,ARPC3,ARPC4,ARPC5,ARPC5L,FGFR1,MYH9,MYL6,MYL9,PARD3,RAC1,RAP1B,RASD1,RRAS2,TUBA1A,TUBB,VCL,ZYX                                                                                                                      | 2.5E-09 |        |
| Mitochondrial Dysfunction*                   | COX17,COX6B1,COX7B,COX7C,CYCS,NDUFA2,NDUFA6,NDUFB3,NDUFB4,NDUFB6,NDUFS5,NDUFS6,NDUFS7,NDUFS8,OGDH,PARK7,PRDX3,PRDX5,PSENEN,SOD2,UQCR10,UQCRB,UQCRH,UQCRQ,VDAC1                                                                                                | 5.9E-09 |        |

| <b>Supplemental Table 9. Common upstream regulators of <i>EGF</i> and <i>CCL2</i> coregulated transcripts in DCT and ATL cells</b> |                                                                   |                           |                                                                  |                           |
|------------------------------------------------------------------------------------------------------------------------------------|-------------------------------------------------------------------|---------------------------|------------------------------------------------------------------|---------------------------|
| <b>Upstream Transcriptional Regulators</b>                                                                                         | <b>Down-regulated Gene Signature in EGF<sup>-</sup> DCT Cells</b> |                           | <b>Up-regulated Gene Signature in CCL2<sup>+</sup> ATL Cells</b> |                           |
|                                                                                                                                    | <b>Activation Z-score</b>                                         | <b>P-value of Overlap</b> | <b>Activation Z-score</b>                                        | <b>P-value of Overlap</b> |
| HIF1A                                                                                                                              | -1.89                                                             | 0.0114                    | 4.793                                                            | <0.0001                   |
| FOXO1                                                                                                                              | -2.18                                                             | 0.0060                    | 3.286                                                            | <0.0001                   |
| PPARGC1B                                                                                                                           | -2.21                                                             | 0.0001                    | 2.607                                                            | 0.0017                    |
| SS18                                                                                                                               | -2.00                                                             | 0.0004                    | 2.236                                                            | 0.0116                    |
| KDM5A                                                                                                                              | 2.24                                                              | 0.0090                    | -3.499                                                           | <0.0001                   |
| EZH2                                                                                                                               | 2.20                                                              | 0.0163                    | 1.944                                                            | <0.0001                   |

ATL = ascending thin loop of Henle; *CCL2* = gene encoding monocyte chemoattractant protein-1 (MCP-1); DCT = distal convoluted tubule; EZH2 = Enhancer of zeste 2 polycomb repressive complex 2 subunit; FOXO1 = Forkhead box O1; HIF1A = Hypoxia-inducible factor 1 subunit alpha; KDM5A = Lysine Demethylase 5A; PPARGC1B = Peroxisome Proliferator Activated Receptor Gamma Coactivator 1 Beta; SS18 = SS18 Subunit Of BAF Chromatin Remodeling Complex.

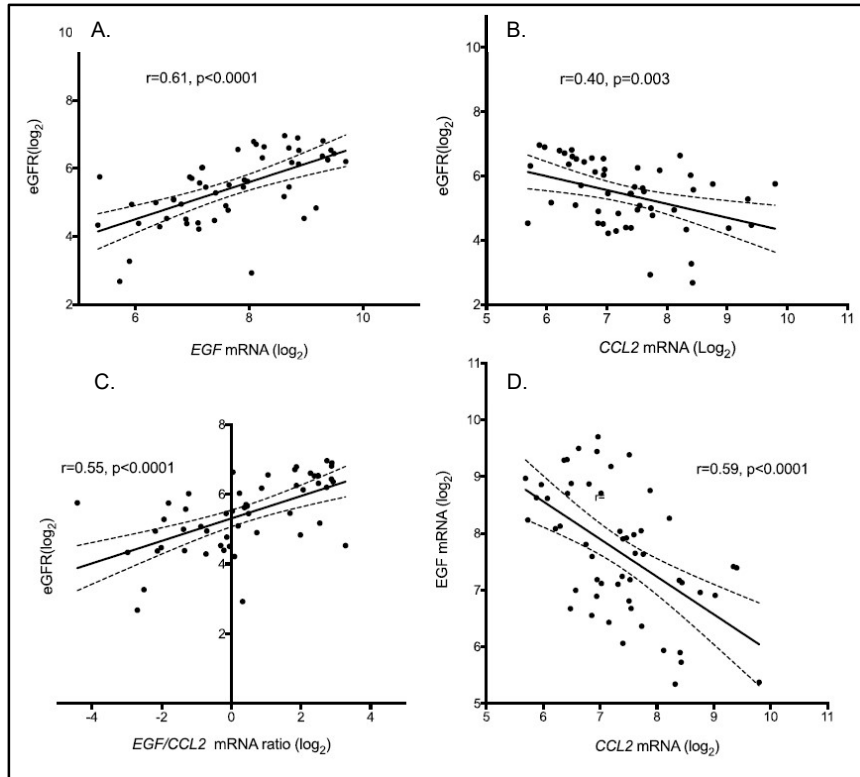

**Supplemental Figure 1. Association of *EGF* and *CCL2* mRNA levels in kidney tissue of patients with chronic kidney disease (diabetic kidney disease, hypertension-attributed kidney disease, and focal segmental glomerulosclerosis), and their correlation with eGFR. (A) *CCL2* = gene encoding monocyte chemoattractant protein-1 (MCP-1); *EGF* = epidermal growth factor; eGFR = estimated glomerular filtration rate.**

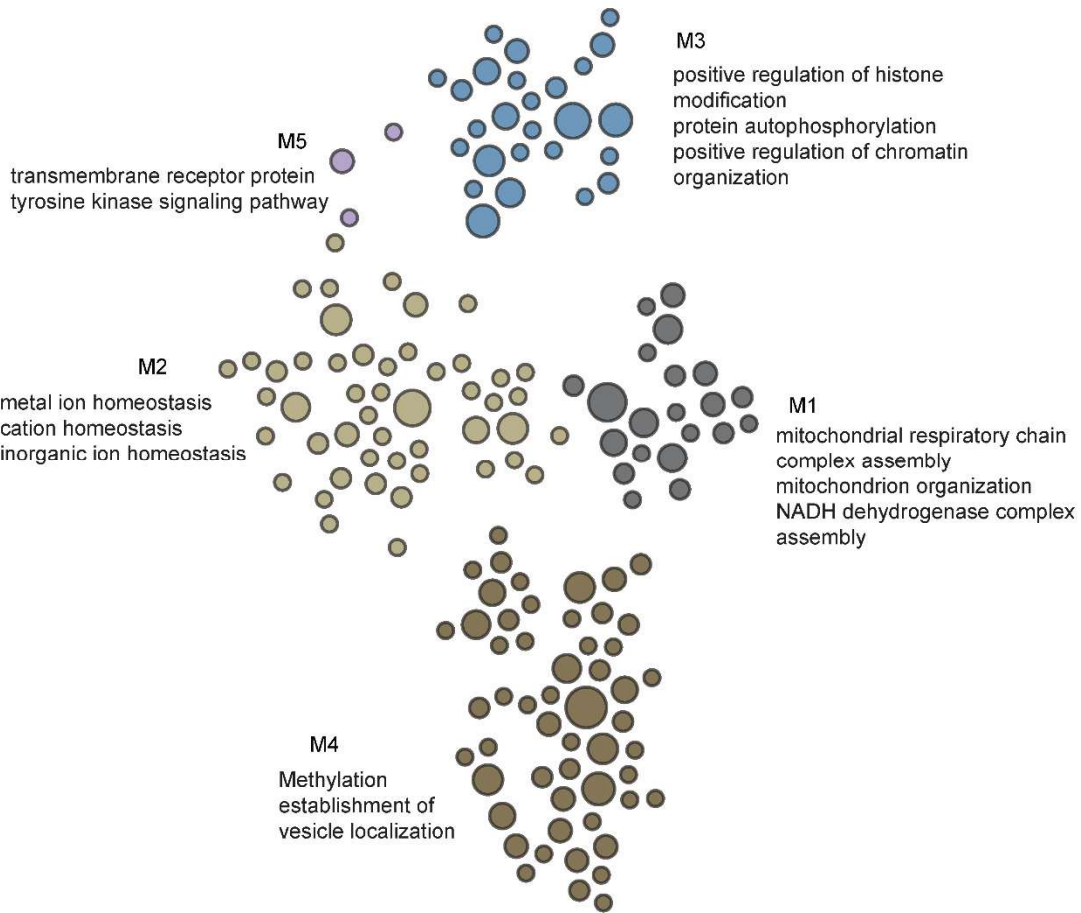

**Supplemental Figure 2. Functional summaries of repressed signatures in *EGF*<sup>-</sup> DCT cells in patients with AKI.** Functional summary of repressed signature in *EGF*<sup>-</sup> DCT cells of patients with AKI – community clustering and enriched processes of the genes that are significantly down regulated in DCT cells that do not express *EGF* compared to *EGF*-expressing DCT cells. Each dot represents input gene, and the size of the dot indicates relative connectivity.

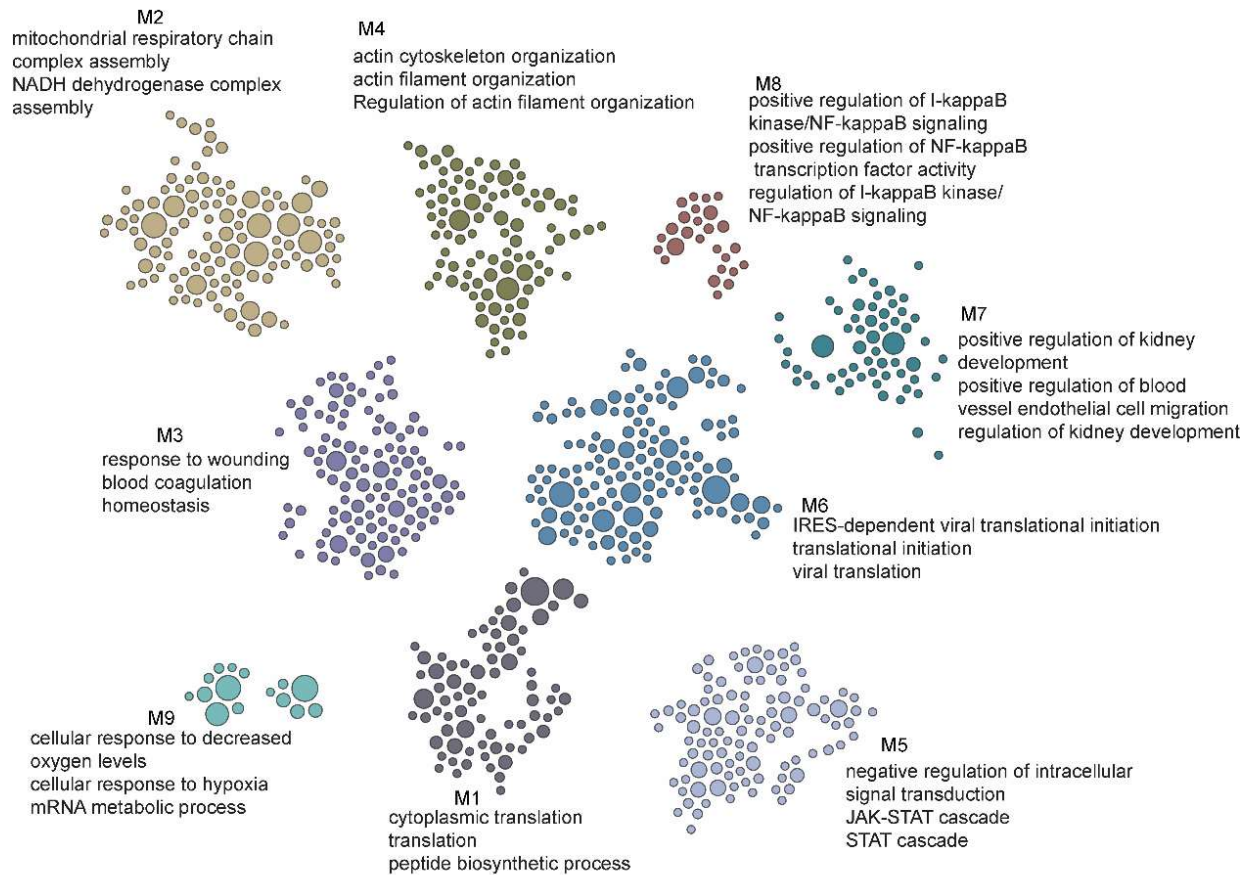

**Supplemental Figure 3. Functional summaries of repressed signatures in *CCL2*<sup>+</sup> ATL cells in patients with AKI.** Functional summary of *CCL2*<sup>+</sup> expression signature – community clustering and enriched processes of the genes that are significantly up-regulated in *CCL2*-expressing+ ATL cells compared to those that do not. NADH = nicotinamide adenine dinucleotide hydride; JAK-STAT= Janus kinase (JAK) - signal transducer and activator of transcription protein (STAT). Each dot represents input gene, and the size of the dot indicates relative connectivity.

## Supplemental Acknowledgements

### For the Kidney Precision Medicine Project

*American Association of Kidney Patients, Tampa, FL:* Richard Knight

*Beth Israel Deaconess, Boston, MA:* Stewart Lecker, Isaac Stillman

*Boston Cell Standards, Boston, MA:* Steve Bogen

*Boston Medical Center, Boston, MA:* Afolarin A. Amodu, Titlayo Ilori, Shana Maikhor, Insa Shmidt

*Boston University, Boston, MA:* Sushrut Waikar, Laurence H. Beck, Joel M. Henderson, Ingrid Onul, Ashish Verma

*Brigham & Women's Hospital, Boston, MA:* Gearoid McMahon, Astrid Weins, Samuel Short, Mia R. Colona, M. Todd Valerius

*Broad Institute, Cambridge, MA:* Anna Greka, Nir Hacohen, Paul Hoover, Jamie L. Marshall

*Case Western Reserve, Cleveland, OH:* Mark Aulisio, Yijiang M. Chen, Andrew Janowczyk, Catherine

Jayapandian, Vidya S. Viswanathan, William S. Bush, Dana C. Crawford, Anant Madabhushi

*Cleveland Clinic, Cleveland, OH:* Lakeshia Bush, Leslie Cooperman, Agustin Gonzalez-Vicente, Leal Herlitz,

John O'toole, Emilio Poggio, John Sedor, Stacey Jolly, Ellen Palmer, Dianna Sendrey, Kassandra Spates-Harden, Jonathan Taliercio

*University of Colorado, Boulder, CO:* Petter M. Bjornstad, Laura Pyle, Carissa Vinovskis

*Columbia University, New York, NY:* Paul Appelbaum, Olivia Balderes, Jonathan Barasch, Andrew Bomback,

Pietro A. Canetta, Vivette D. D'Agati, Krzysztof Kiryluk, Satoru Kudose, Karla Mehl, Jai Radhakrishnan,

Chenhua Weng, Ning Shang

*Duke University, Durham, NC:* Shweta Bansal

*European Molecular Biology Laboratory, Heidelberg, Germany:* Theodore Alexandrov

*Harvard University, Boston, MA:* Helmut Rennke

*Indiana University, Indianapolis, IN:* Tarek M. El-Achkar, Daria Barwinska, Sharon Bledsoe, Katy Borner,

Andreas Bueckle, Yinghua Cheng, Pierre Dagher, Kenneth Dunn, Michael Eadon, Michael Ferkowicz, Bruce

W. Herr, Katherine Kelly, Ricardo Melo Ferreira, Ellen M. Quardokus, Elizabeth Record, Marcelino Rivera, Jing

Su, Timothy Sutton, Seth Winfree, James C. Williams, Jr

*John Hopkins University, Baltimore, MD:* Steven Menez, Chirag Parikh, Avi Rosenberg, Pam Villalobos, Rubab

Malik, Derek Fine, Mohammed Atta, Jose Manuel Monroy Trujillo, Yumeng Weng

*Joslin Diabetes Center, Boston, MA:* Camille Johansen, Alison Slack, Sylvia Rosas, Mark Williams, Neil Roy, Jennifer Sun

*Mount Sinai, New York, NY:* Evren Azeloglu, Cijang (John) He, Ravi Iyengar, Jens Hansen, Yuguang Xiong

*Northshore:* Pottumarthi Prasad

*Northwestern University, Chicago, IL:* Anand Srivastava

*Ohio State University, Columbus, OH:* Samir Parikh, Brad Rovin, Sethu M. Madhavan, John P. Shapiro

*Pacific Northwest National Laboratories, Richland, WA:* Chris Anderton, Ljiljana Pasa-Tolic, Dusan Velickovic,

Jessica Lukowski

*Parkland Center for Clinical Innovation, Dallas, TX:* George (Holt) Oliver

*Patient Partners:* Joseph Ardayfio, Jack Bebiak, Keith Brown, Taneisha Campbell, Catherine Campbell, Lynda

Hayashi, Nichole Jefferson, Robert Koewler, Glenda Roberts, John Saul, Anna Shpigel, Edith Christine

Stutzke, Lorenda Wright, Leslie Miegs, Roy Pinkeney

*Princeton University, Princeton, NJ:* Rachel Sealfon, Olga Troyanskaya, Aaron Wong

*Providence Medical Research Center, Providence Health Care, Spokane, WA:* Katherine Tuttle

*Stanford University, Palo Alto, CA:* Dejan Dobi, Yury Goltsev

*SUNY Buffalo, Buffalo, NY:* Brandon Ginley, Nicholas Lucarelli, Brendon Lutnick, Pinaki Sarder

*University of California San Diego, La Jolla, CA:* Blue Lake, Kun Zhang

*University of California San Francisco, San Francisco, CA:* Patrick Boada, Maria Joanes, Zoltan Laszik,

Andrew Schroeder, Minnie Sarwal, Tara Sigdel, Gary Nolan, Kavya Anjani, Tariq Mukatah

*University of Cincinnati, Cincinnati, OH:* Rita R. Alloway, Ashley R. Burg, Paul J. Lee, Adele Rike, Tiffany Shi, E. Steve Woodle

*University of Michigan, Ann Arbor, MI:* Heather Ascani, Ulysses Balis, Victoria Blanc, Ninive C. Conser, Renee

Frey, Yougqun He, Oliver He, Jeffrey Hodgkin, Matthias Kretzler, Jinghui Luo, Laura Mariani, Rajasree Menon,

Edgar Otto, Jennifer Schaub, Becky Steck, Chrysta Lienczewski, Sean Eddy

*University of Pittsburgh, Pittsburgh, PA:* Michele Elder, Matthew Gilliam, Daniel Hall, John Kellum, Mary Kruth,

Raghav Murugan, Paul Palevsky, Parmjeet Randhawa, Matthew Rosengart, Sunny Sims-Lucas, Mary

Stefanick, Stacy Stull, Mitchell Tublin, Tina Vita, James Winters  
*University of Washington, Seattle, WA:* Charles Alpers, Ian de Boer, Ashley Berglund, Ashveena Dighe, Jonathan Himmelfarb, Robyn McClelland, Sean Mooney, Stuart Shankland, Kayleen Williams, Kristina Blank, Jonas Carson, Frederick Dowd, Zach Drager, Christopher Park, Stephanie M. Grewenow, Andrew N. Hoofnagle, Chistine Limonte, Kasra Rezaei, James Snyder, Ruikang Wang, Adam Wilcox  
*UT Health San Antonio, Center for Renal Precision Medicine, San Antonio, TX:* Kumar Sharma, Guanshi Zhang, Shweta Bansal, Manjeri Venkatachalam, Richard Montellano, Annapurna Pamreddy, Hongping Ye  
*UT Southwestern Medical Center, Dallas, TX:* S. Susan Hedayati, Asra Kermani, Simon Lee, Christopher Lu, Tyler Miller, Orson Moe, Jiten Patel, Anil Pillai, Harold Park, Kamalanathan Sambandam, Francisco Sanchez, Jose Torrealba, Robert Toto, Miguel Vazquez, Nancy Wang, Dianbo Zhang  
*Vanderbilt University, Nashville, TN:* Richard M Caprioli, Nathan Patterson, Kavya Sharman, Jevvrey M. Spraggins, Raf Van de Plas  
*Washington University in St. Louis, St. Louis, MO:* Jeanine Basta, Sabine M. Dieltman, Joe Gaut, Sanjay Jain, Anitha Vijayan, Michael I. Rauchman  
*Yale University, New Haven, CT:* Tanima Arora, Lloyd Cantley, Vijaykumar R. Kakade, Melissa Shaw, Randy Luciano, Dennis Moledina, Ugwuowo Ugochukwu, Francis Perry Wilson, Sandy Alfano

For the TRIBE-AKI Consortium

*Johns Hopkins University School of Medicine, Baltimore, Maryland:* Steven Menez, Heather Thiessen-Philbrook, Yaqi Jia, Wassim Obeid, Chirag Parikh  
*Yale School of Medicine, New Haven, Connecticut:* Dennis G. Moledina, Sherry G. Mansour,  
*ICES, Ontario, Canada:* Eric McArthur  
*University of Chicago, Chicago, Illinois:* Jay L. Koyner  
*University of California San Francisco, San Francisco, California:* Michael Shlipak  
*Icahn School of Medicine at Mount Sinai, New York, New York:* Steven G. Coca  
*Schulich School of Medicine and Dentistry, Western University, London, Ontario, Canada:* Amit X. Garg
